# Supplementary material for: Entwicklung und Validierung eines Fragebogens zur Erfassung von Freude am Schulsport im Jugendalter (FEFS-J)
Source: Atypon-hosted journal article supplement (doi:10.1026/0012-1924/a000222), 2019-02-01
Supplement: 0012-1924_a000222_esm1.pdf [file 0012-1924_a000222_esm1.pdf]

*Elektronisches Supplement 1. Testverfahren zur Erfassung von Freude, Flow-Erleben und Erholung*

|                       | Physical Activity Enjoyment Scale (Jekauc et al., 2012) <sup>a</sup> | Magglinger Sportenjoyment Scale (Birrer & Stirnimann, 2009) | Sport Commitment Questionnaire (Scanlan et al., 1993) <sup>b</sup> | Exercise enjoyment Scale (Stanley, Williams & Cumming, 2009) | Berner Motiv- und Zielinventar (Lehnert, Sudeck & Conzelmann, 2011) | Flow-Kurzskala (Rheinberg, Vollmeyer & Engeser, 2003) | Work-related flow inventory (Bakker, 2007) |
|-----------------------|----------------------------------------------------------------------|-------------------------------------------------------------|--------------------------------------------------------------------|--------------------------------------------------------------|---------------------------------------------------------------------|-------------------------------------------------------|--------------------------------------------|
| Stichprobengröße      | <i>N</i> = 504 (50 % weiblich)                                       | <i>N</i> = 602 (69 % weiblich)                              | <i>N</i> = 178 (47 % weiblich)                                     | –                                                            | <i>N</i> = 1 098                                                    | <i>N</i> = 206                                        | <i>N</i> = 1 346                           |
| Alter in Jahren       | <i>M</i> = 13.9; <i>SD</i> = 2.2                                     | <i>M</i> = 16.7; <i>SD</i> = 1.4                            | 10–20                                                              | –                                                            | <i>M</i> = 34.8–63.1                                                | –                                                     | <i>M</i> = 29.9–42.9                       |
| Altersbereich         | Kindes- und Jugendalter                                              | spätes Jugendalter                                          | Jugendalter                                                        | –                                                            | Erwachsene                                                          | –                                                     | Erwachsene                                 |
| Anwendungsbereich     | körperliche Aktivität                                                | Schulsport                                                  | spezifische Sportarten                                             | Training                                                     | Freizeit- und Gesundheitssport                                      | tätigkeitsübergreifend                                | Arbeitsbereich                             |
| Zeitliche Ausrichtung | State                                                                | State                                                       | Trait                                                              | State                                                        | Trait                                                               | State                                                 | Trait                                      |
| Itemanzahl            | 16                                                                   | 20                                                          | 19                                                                 | 3                                                            | 24                                                                  | 10                                                    | 13                                         |
| Dimensionen           | 1                                                                    | 6 (relevant: 2)                                             | 6 (relevant: 1)                                                    | 1                                                            | 7 (relevant: 2)                                                     | 2                                                     | 3 (relevant: 2)                            |
| Vergnügen             | Physical Activity Enjoyment                                          | Freude an der Aktivität (4 Items)                           | Sport Enjoyment                                                    | Exercise-Enjoyment                                           | Aktivierung / Freude (3 Items)                                      | nein                                                  | Work Enjoyment (4 Items)                   |
| Flow-Erleben          | nein                                                                 | nein                                                        | nein                                                               | nein                                                         | nein                                                                | Absorbiertheit (4 Items), glatter Verlauf (6 Items)   | Absorption (4 Items)                       |
| Erholung              | 1 Item                                                               | Spezielle Bewegungsempfindungen (4 Items)                   | nein                                                               | nein                                                         | Ablenkung / Katharsis (4 Items)                                     | nein                                                  | nein                                       |

*Anmerkungen:* <sup>a</sup> Jekauc, Voelke, Wagner, Mewes und Woll (2012); <sup>b</sup> Scanlan, Carpenter, Schmidt, Simons und Keeler (1993)
