# Supplementary material for: Entwicklung und Validierung eines Fragebogens zur Erfassung von Freude am Schulsport im Jugendalter (FEFS-J)
Source: Atypon-hosted journal article supplement (doi:10.1026/0012-1924/a000222), 2019-02-01
Supplement: 0012-1924_a000222_esm2.pdf [file 0012-1924_a000222_esm2.pdf]

*Elektronisches Supplement 2. Verteilung der Stichproben nach Geschlecht, Alter und Klassenstufe*

|                 | <i>N</i> | Geschlecht (%) |    |       | Alter    |           | Klassenstufe (%) |    |    |    |
|-----------------|----------|----------------|----|-------|----------|-----------|------------------|----|----|----|
|                 |          | w              | m  | k. A. | <i>M</i> | <i>SD</i> | 7                | 8  | 9  | 10 |
| Vorstudie I     | 33       | 58             | 4  | 0     | 13.84    | 1.20      | 30               | 0  | 70 | 0  |
| Vorstudie II    | 312      | 50             | 48 | 2     | 14.37    | 1.09      | 14               | 27 | 38 | 22 |
| Vorstudie III   | 366      | 55             | 45 | 1     | 14.56    | 1.24      | 20               | 22 | 38 | 18 |
| Hauptstudie     | 1 253    | 52             | 47 | 1     | 14.41    | 1.30      | 25               | 28 | 26 | 21 |
| HGS             | 364      | 45             | 52 | 3     | 14.35    | 1.34      | 38               | 23 | 31 | 8  |
| RS              | 437      | 54             | 46 | 0     | 14.78    | 1.20      | 16               | 25 | 31 | 28 |
| GYM             | 452      | 56             | 43 | 1     | 14.10    | 1.27      | 24               | 33 | 18 | 24 |
| RT <sup>a</sup> | 95       | 48             | 49 | 3     | 14.36    | 1.10      | 24               | 35 | 20 | 20 |
| KV <sup>b</sup> | 213      | 48             | 50 | 1     | 14.53    | 1.11      | 24               | 33 | 21 | 23 |

*Anmerkungen:* w = weiblich, m = männlich, k. A. = keine Angabe. HGS = Haupt- und Gesamtschulen; RS = Realschule; GYM = Gymnasium; RT = Retest; KV = Konvergente Validität.

<sup>a</sup> Die Testwiederholung erfolgte an einer Substichprobe (HGS: *n* = 64, RS: *n* = 17, GYM: *n* = 14). <sup>b</sup> Die konvergente Validität wurde an einer unabhängigen Stichprobe geprüft (HGS: *n* = 51, RS: *n* = 21, GYM: *n* = 141).
