# Supplementary material for: Entwicklung und Validierung eines Fragebogens zur Erfassung von Freude am Schulsport im Jugendalter (FEFS-J)
Source: Atypon-hosted journal article supplement (doi:10.1026/0012-1924/a000222), 2019-02-01
Supplement: 0012-1924_a000222_esm3.pdf [file 0012-1924_a000222_esm3.pdf]

### Elektronisches Supplement 3. Vorstudien

Insgesamt wurden drei Vorstudien (s. elektronisches Supplement 2) mit unterschiedlichen Zielsetzungen durchgeführt, die entsprechende Überarbeitungen nach sich zogen. Das Ziel der ersten Vorstudie bestand darin, die allgemeine Durchführbarkeit des Fragebogens zu prüfen. Es nahmen  $N = 33$  Schülerinnen und Schüler im Alter von 12 bis 16 Jahren ( $M = 13.84$ ;  $SD = 1.20$ ; 58 % weiblich) einer siebten und einer neunten Klasse einer Stadtteilschule in Hamburg teil. Die Items wurden anhand einer vierstufigen Häufigkeitsskala („nie“, „manchmal“, „oft“, „fast immer“) beantwortet. Zusätzlich stand die Option „weiß nicht“ zur Verfügung, um Items, die nicht eindeutig zu beantworten waren, im Anschluss leichter identifizieren zu können. Die Schülerinnen und Schüler hatten nach der Bearbeitung die Möglichkeit, den Fragebogen hinsichtlich Verständlichkeit, Übersichtlichkeit und Antwortmöglichkeiten zu bewerten. Die Datenauswertung erfolgte schwerpunktmäßig qualitativ anhand der Bewertungen der Schülerinnen und Schüler sowie der Beobachtungen der Versuchsleitung während der Testdurchführung. Items, die wiederholt zu Verständnisschwierigkeiten führten, wurden modifiziert. Ein Item wurde aufgrund geringer Trennschärfe und Schwierigkeit eliminiert. Erste Häufigkeitsanalysen zeigten eine linksschiefe Verteilung der Daten. Um einer Normalverteilung näher zu kommen, wurde die positivste Antwortmöglichkeit zu „immer“ modifiziert. Die allgemeine Durchführung inklusive standardisierter Instruktion verlief problemlos.

Die zweite Vorstudie zielte darauf ab, das Antwortformat festzulegen. Die Durchführung erfolgte an einer Stadtteilschule in Hamburg und einem Gymnasium in Niedersachsen. Die Stichprobe bestand aus  $N = 312$  Schülerinnen und Schülern im Alter von 12 bis 18 Jahren ( $M = 14.37$ ;  $SD = 1.09$ ; 50 % weiblich) der Klassenstufen 7 bis 10. Die Stichprobe wurde aufgeteilt, um zwei verschiedene Antwortskalen zu testen. Schülerinnen und Schüler der ersten Stichprobe ( $n_1 = 155$ ; 51 % weiblich) bearbeiteten den Fragebogen mit einer Häufigkeitsskala („nie“, „manchmal“, „oft“, „immer“) und die zweite Stichprobe ( $n_2 = 157$ ; 49 % weiblich) beurteilte die Items anhand einer Zustimmungsskala („stimmt gar nicht“, „stimmt eher nicht“, „stimmt eher“, „stimmt völlig“). Erneut stand die Option „weiß nicht“ zusätzlich zur Verfügung. Die drei Skalen des Fragebogens umfassten vier bis fünf Items. Aufgrund der qualitativen Fragebogenbewertung der Schülerinnen und Schüler sowie der tendenziell besseren statistischen Kennwerte wurde die Häufigkeitsskala für die Durchführung der weiteren Studien festgelegt. In der weiteren Fragebogenrevision wurden abschließend die Items ausgewählt und gegebenenfalls modifiziert, die unter psychometrischen Gesichtspunkten besser geeignet erschienen oder aus inhaltlichen Überlegungen beibehalten werden sollten.

Die dritte Vorstudie wurde in Hamburg und Niedersachsen mit dem Ziel durchgeführt, die endgültige Fragebogenversion zu erstellen. Die Stichprobe bestand aus  $N = 366$  Schülerinnen und Schülern zwischen 12 und 18 Jahren ( $M = 14.56$ ;  $SD = 1.24$ ; 55 % weiblich) und verteilte sich auf Gymnasien, Realschulen und Gesamtschulen über die Klassenstufen 7 bis 10. Die Skalen enthielten in dieser Version jeweils nur noch vier Items. Die Antwortmöglichkeit „weiß nicht“ war nicht mehr enthalten. In die abschließende Beurteilung und Modifikation flossen diverse Item- und Skalenanalysen ein.

Der finale Fragebogen besteht aus drei Skalen (*Vergnügen*, *Erholung*, *Flow-Erleben*) mit je drei Items. Es wird eine vierstufige Ratingskala vorgegeben („0 = nie“, „1 = manchmal“, „2 = oft“, „3 = immer“). Die neun Items sind wortlautgetreu inklusive ihrer jeweiligen Herkunft dem elektronischen Supplement 4 zu entnehmen.
