# Supplementary material for: Entwicklung und Validierung eines Fragebogens zur Erfassung von Freude am Schulsport im Jugendalter (FEFS-J)
Source: Atypon-hosted journal article supplement (doi:10.1026/0012-1924/a000222), 2019-02-01
Supplement: 0012-1924_a000222_esm4.pdf [file 0012-1924_a000222_esm4.pdf]

*Elektronisches Supplement 4. Items mit angenommener Skalenzuordnung inklusive Herkunft*

| Item  | Itemwortlaut                                                    | Herkunft                             |
|-------|-----------------------------------------------------------------|--------------------------------------|
| VE_01 | „Sportunterricht macht mir Spaß.“                               | Scanlan et al. (1993) <sup>a</sup>   |
| VE_02 | „Sportunterricht macht mich fröhlich.“                          | Scanlan et al. (1993)                |
| VE_03 | „Sportunterricht tut mir gut.“                                  | Jekauc et al. (2012) <sup>b</sup>    |
| FL_01 | „Im Sportunterricht gibt es Aktivitäten, die mich begeistern.“  | Bakker (2008)                        |
| FL_02 | „Im Sportunterricht vergeht die Zeit wie im Flug.“              | Rheinberg et al. (2003) <sup>c</sup> |
| FL_03 | „Im Sportunterricht fühle ich mich optimal beansprucht.“        | Rheinberg et al. (2003)              |
| ER_01 | „Im Sportunterricht kann ich mich von anderen Fächern erholen.“ | selbst entwickelt                    |
| ER_02 | „Sportunterricht hilft mir, den Kopf frei zukriegen.“           | selbst entwickelt                    |
| ER_03 | „Sportunterricht gibt mir Energie für andere Dinge.“            | Jekauc et al. (2012)                 |

*Anmerkungen:* VE = Vergnügen; FL = Flow-Erleben; ER = Erholung. Sämtliche Items wurden modifiziert und lediglich in Anlehnung an bestehende Items formuliert.

<sup>a</sup>Scanlan, Carpenter, Schmidt, Simons & Keeler (1993); <sup>b</sup>Jekauc, Voelkle, Wagner, Mewes & Woll (2012); <sup>c</sup>Rheinberg, Vollmeyer & Engeser (2003). Antwortformat: „0 = nie“, „1 = manchmal“, „2 = oft“, „3 = immer“.
