# Supplementary material for: Entwicklung und Validierung eines Fragebogens zur Erfassung von Freude am Schulsport im Jugendalter (FEFS-J)
Source: Atypon-hosted journal article supplement (doi:10.1026/0012-1924/a000222), 2019-02-01
Supplement: 0012-1924_a000222_esm5.pdf [file 0012-1924_a000222_esm5.pdf]

*Elektronisches Supplement 5. Skalen und Items zur Prüfung der konvergenten Validität (N = 213)*

| Testverfahren                                                                                                            | <i>M</i> | <i>SD</i> |
|--------------------------------------------------------------------------------------------------------------------------|----------|-----------|
| <hr/>                                                                                                                    |          |           |
| Skalen zur motivationalen Regulation beim Lernen (SMR-L) – Intrinsische Motivation (Müller, Hanfstingl & Andreitz, 2007) |          |           |
| <hr/>                                                                                                                    |          |           |
| „Ich arbeite und lerne in diesem Fach,                                                                                   |          |           |
| 1. ... weil es mir Spaß macht.“                                                                                          | 3.61     | 1.19      |
| 2. ... weil ich neue Dinge lernen möchte.“                                                                               | 3.28     | 1.25      |
| 3. ... weil ich es genieße, mich mit diesem Fach auseinanderzusetzen.“                                                   | 3.35     | 1.25      |
| 4. ... weil ich gerne Aufgaben aus diesem Fach löse.“                                                                    | 3.21     | 1.19      |
| 5. ... weil ich gerne über Dinge dieses Faches nachdenke.“                                                               | 2.71     | 1.31      |
| <hr/>                                                                                                                    |          |           |
| Berner Motiv- und Zielinventar (BMZI) – Ablenkung / Katharsis (Lehnert, Sudeck & Conzelmann, 2011)                       |          |           |
| <hr/>                                                                                                                    |          |           |
| „Warum treibst du Sport?                                                                                                 |          |           |
| 1. ... um Ärger und Gereiztheit anzubauen.“                                                                              | 2.50     | 1.38      |
| 2. ... weil ich mich so von anderen Problemen ablenke.“                                                                  | 2.87     | 1.39      |
| 3. ... um Stress abzubauen.“                                                                                             | 2.92     | 1.46      |
| 4. ... um meine Gedanken im Kopf zu ordnen.“                                                                             | 2.77     | 1.39      |
| <hr/>                                                                                                                    |          |           |
| Physische Selbstkonzept (PSK) – Allgemeine Sportlichkeit (Stiller, Würth & Alfermann, 2004)                              |          |           |
| <hr/>                                                                                                                    |          |           |
| 1. „Bei den meisten Sportarten bin ich gut.“                                                                             | 2.99     | 0.89      |
| 2. „Die meisten Sportarten fallen mir leicht.“                                                                           | 2.93     | 0.86      |
| 3. „Ich bin besser im Sport als die meisten meiner Freunde.“                                                             | 2.63     | 0.98      |
| 4. „Andere Leute denken, dass ich gut im Sport bin.“                                                                     | 2.88     | 1.01      |
| <hr/>                                                                                                                    |          |           |

*Anmerkungen:* Antwortformate der Skalen: SMR-L „1 = *stimmt überhaupt nicht*“ bis „4 = *stimmt völlig*“; BMZI „1 = *trifft nicht zu*“ bis „5 = *trifft sehr zu*“; PSK „1 = *trifft nicht zu*“ bis „4 = *trifft zu*“.
