# Supplementary material for: Entwicklung und Validierung eines Fragebogens zur Erfassung von Freude am Schulsport im Jugendalter (FEFS-J)
Source: Atypon-hosted journal article supplement (doi:10.1026/0012-1924/a000222), 2019-02-01
Supplement: 0012-1924_a000222_esm6.pdf [file 0012-1924_a000222_esm6.pdf]

Elektronisches Supplement 6. Item und Skalenkennwerte der Hauptstichprobe (3-CFA-Analyse, N = 1 253)

| Item  | Itemkennwerte |           |          |          |           |       | Skalenkennwerte |              |             |             | Konstruktvalidität |            |
|-------|---------------|-----------|----------|----------|-----------|-------|-----------------|--------------|-------------|-------------|--------------------|------------|
|       | <i>M</i>      | <i>SD</i> | <i>S</i> | <i>K</i> | $\lambda$ | $R^2$ | $M_{Skala}$     | $SD_{Skala}$ | $S_{Skala}$ | $K_{Skala}$ | <i>H</i>           | <i>DEV</i> |
| VE_01 | 1.99          | 0.74      | -0.13    | -0.77    | .87       | .76   |                 |              |             |             |                    |            |
| VE_02 | 1.66          | 0.91      | -0.06    | -0.85    | .90       | .82   | 1.88            | 0.74         | -0.24       | -0.77       | .91                | .76        |
| VE_03 | 1.98          | 0.89      | -0.42    | -0.74    | .84       | .71   |                 |              |             |             |                    |            |
| FL_01 | 1.71          | 0.75      | 0.07     | -0.52    | .75       | .56   |                 |              |             |             |                    |            |
| FL_02 | 2.15          | 0.90      | -0.74    | -0.44    | .74       | .54   | 1.80            | 0.63         | -0.32       | -0.18       | .72                | .46        |
| FL_03 | 1.53          | 0.83      | 0.04     | -0.56    | .54       | .29   |                 |              |             |             |                    |            |
| ER_01 | 1.85          | 1.08      | -0.42    | -1.13    | .85       | .73   |                 |              |             |             |                    |            |
| ER_02 | 1.52          | 1.04      | 0.03     | -1.17    | .86       | .75   | 1.60            | 0.91         | -0.13       | -1.05       | .89                | .74        |
| ER_03 | 1.43          | 0.99      | 0.07     | -1.02    | .86       | .74   |                 |              |             |             |                    |            |

Anmerkungen: *S* = Schiefe (Standardfehler = .07); *K* = Kurtosis (Standardfehler = .14);  $\lambda$  = Faktorladungen;  $R^2$  = erklärte Varianz; *H* = Konstruktreliabilität nach Hancock und Müller (2001); *DEV* = durchschnittlich erfasste Varianz eines Faktors; *VE* = Vergnügen; *FL* = Flow-Erleben; *ER* = Erholung. Antwortformat: „0 = nie“, „1 = manchmal“, „2 = oft“, „3 = immer“.
