# Supplementary material for: Entwicklung und Validierung eines Fragebogens zur Erfassung von Freude am Schulsport im Jugendalter (FEFS-J)
Source: Atypon-hosted journal article supplement (doi:10.1026/0012-1924/a000222), 2019-02-01
Supplement: 0012-1924_a000222_esm7.pdf [file 0012-1924_a000222_esm7.pdf]

*Elektronisches Supplement 7. Faktorladungen und -korrelationen sämtlicher Modelle (N = 1 253)*

|       | g-CFA       | 2-CFA     | 3-CFA     | B-CFA       |           | 3-ESEM    | B-ESEM      |           |
|-------|-------------|-----------|-----------|-------------|-----------|-----------|-------------|-----------|
|       | $\lambda_g$ | $\lambda$ | $\lambda$ | $\lambda_g$ | $\lambda$ | $\lambda$ | $\lambda_g$ | $\lambda$ |
| VE_01 | .86         | .87       | .87       | .85         | .22       | .85       | .89         | .18       |
| VE_02 | .88         | .90       | .90       | .88         | .25       | .54       | .85         | .43       |
| VE_03 | .83         | .84       | .84       | .84         | .07       | .42       | .80         | .15       |
| FL_01 | .74         | .75       | .75       | .75         | .24       | .38       | .74         | .25       |
| FL_02 | .72         | .73       | .74       | .74         | -.11      | -.01      | .76         | -.02      |
| FL_03 | .52         | .53       | .54       | .53         | .26       | .44       | .50         | .34       |
| ER_01 | .82         | .85       | .85       | .78         | .30       | .81       | .80         | .30       |
| ER_02 | .83         | .86       | .86       | .77         | .48       | .88       | .77         | .43       |
| ER_03 | .83         | .86       | .86       | .77         | .35       | .81       | .75         | .41       |

*Anmerkungen:* g-CFA = konfirmatorisches g-Faktormodell, 2-CFA = konfirmatorischen 2-Faktorenmodell, 3-CFA = konfirmatorisches 3-Faktorenmodell, B-CFA = konfirmatorisches Bifaktormodell, 3-ESEM = exploratorisches 3-Faktorenmodell, B-ESEM = exploratorisches Bifaktormodell.  $\lambda$  = spezifische Faktorladung;  $\lambda_g$  = globale Faktorladung; VE = Vergnügen; FL = Flow-Erleben; ER = Erholung; Antwortformat: „0 = nie“, „1 = manchmal“, „2 = oft“, „3 = immer“.
