# Supplementary material for: Entwicklung und Validierung eines Fragebogens zur Erfassung von Freude am Schulsport im Jugendalter (FEFS-J)
Source: Atypon-hosted journal article supplement (doi:10.1026/0012-1924/a000222), 2019-02-01
Supplement: 0012-1924_a000222_esm8.pdf [file 0012-1924_a000222_esm8.pdf]

*Elektronisches Supplement 8. Messinvarianz des exploratorischen Bifaktormodells (B-ESEM) (N = 1 253)*

| Gruppe     | Invarianz  | $\chi^2$ | <i>df</i> | CFI   | TLI   | RMSEA | $\Delta \chi^2$ | <i>df</i> | <i>p</i> |
|------------|------------|----------|-----------|-------|-------|-------|-----------------|-----------|----------|
|            | Konfigural | 13.058   | 12        | 1.000 | 1.000 | .012  |                 |           |          |
| Geschlecht | Stark      | 55.512   | 46        | 1.000 | .999  | .018  | 42.261          | 34        | .156     |
|            | Strikt     | 70.820   | 55        | .999  | .999  | .022  | 17.613          | 9         | .040     |
|            | Konfigural | 8.990    | 12        | 1.000 | 1.001 | 0.00  |                 |           |          |
| Alter      | Stark      | 44.237   | 46        | 1.000 | 1.000 | 0.00  | 34.819          | 34        | .429     |
|            | Strikt     | 53.904   | 55        | 1.000 | 1.000 | 0.00  | 9.094           | 9         | .428     |

*Anmerkungen:*  $\Delta \chi^2$  (*df*) =  $\chi^2$ -Unterschied zwischen genesteten Modellen.
